# Supplementary material
Source: Springer Nature journal article supplement (https://www.springermedizin.de/resource/supplementary/12879_2012_2309_MOESM1_ESM.pdf/9444332)

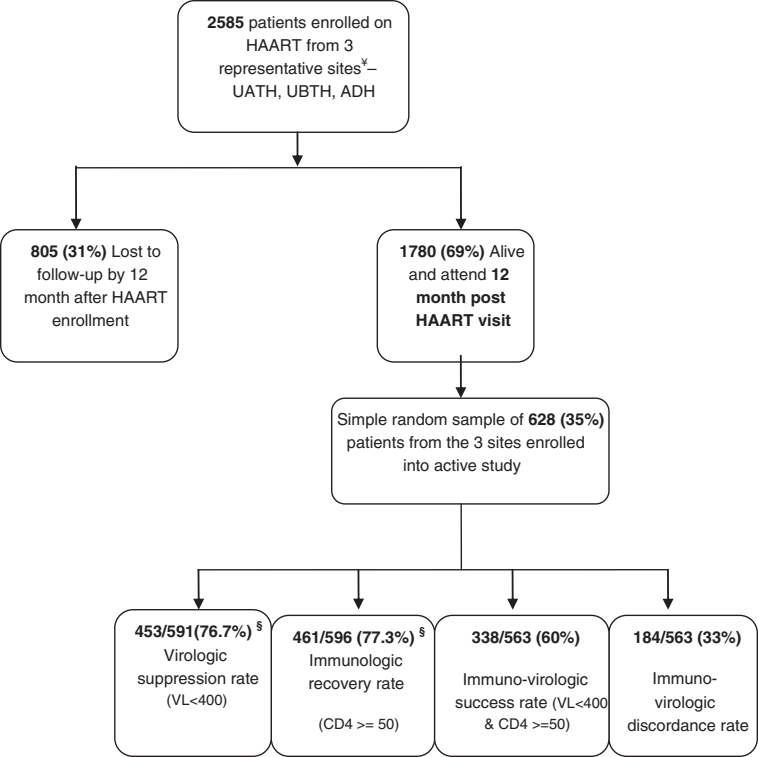

Supplement: MOESM1 [file 9444332]
